# Supplementary material for: Dynamic crosslinked and injectable biohydrogels as extracellular matrix mimics for the delivery of antibiotics and 3D cell culture
Source: Royal Society of Chemistry journal article supplement (doi:10.1039/d0ra02218g), 2020-01-01

## Supplementary Information

Dynamic Crosslinked and Injectable Biohydrogel as Extracellular Matrix

Mimics for Antibiotics Delivery and 3D Cell Culture

*Zhiping Fan*<sup>\*1</sup>, *Ping Cheng*<sup>2</sup>, *Min Liu*<sup>1</sup>, *Sangeeta Prakash*<sup>3</sup>, *Jun Han*<sup>\*1</sup>

<sup>1</sup>*Institute of BioPharmaceutical Research, Liaocheng University, Liaocheng 252059, China*

<sup>2</sup>*Liaocheng High-Tech Biotechnology Co.,Ltd, Liaocheng 252059, China*

<sup>3</sup> *School of Agriculture & Food Sciences, The University of Queensland, Brisbane, QLD, 4072, Australia*

\*Corresponding author: [fanzhiping@lcu.edu.cn](mailto:fanzhiping@lcu.edu.cn)

Figure S0.  $^1\text{H-NMR}$  of PGA

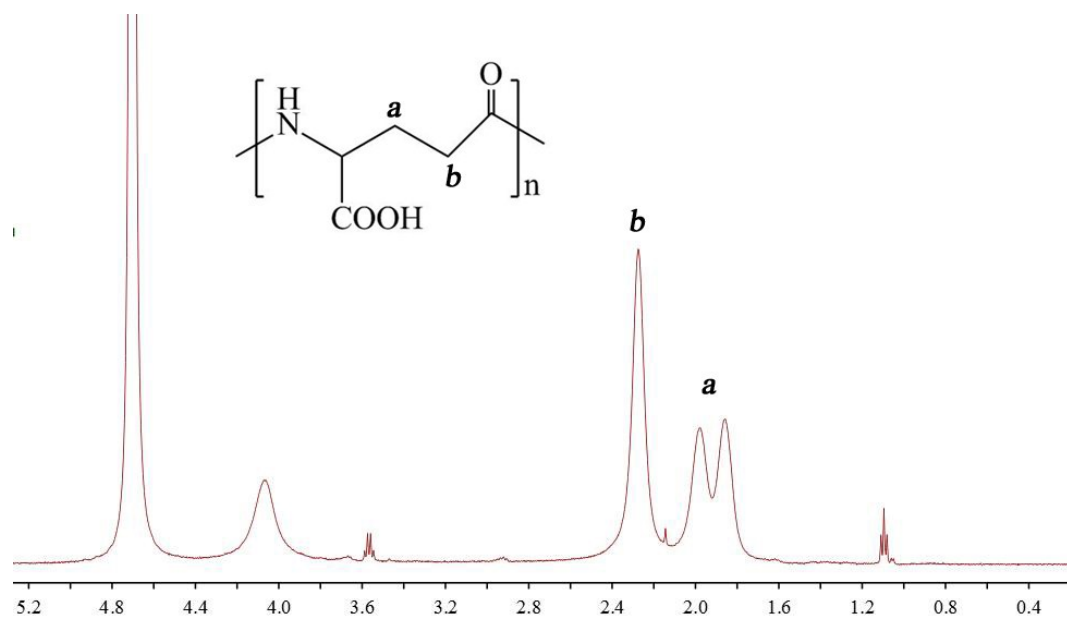

Figure S1.  $^1\text{H-NMR}$  of PGAADH

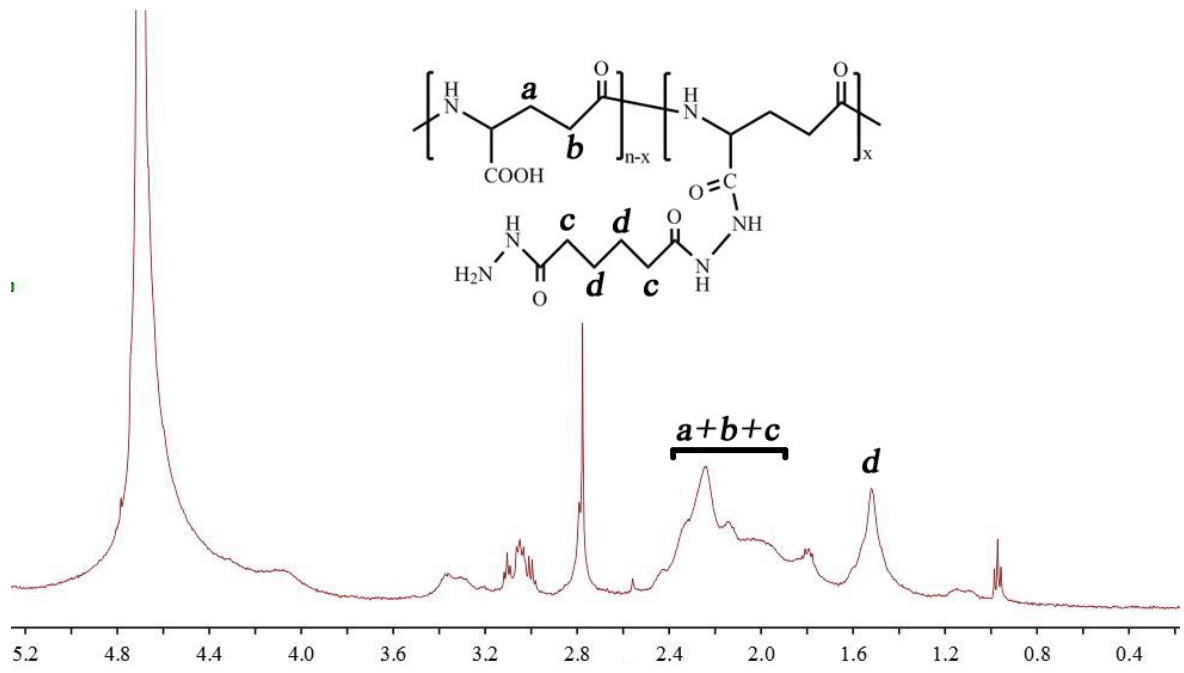

Figure S2.  $^1\text{H}$ -NMR of Dextran

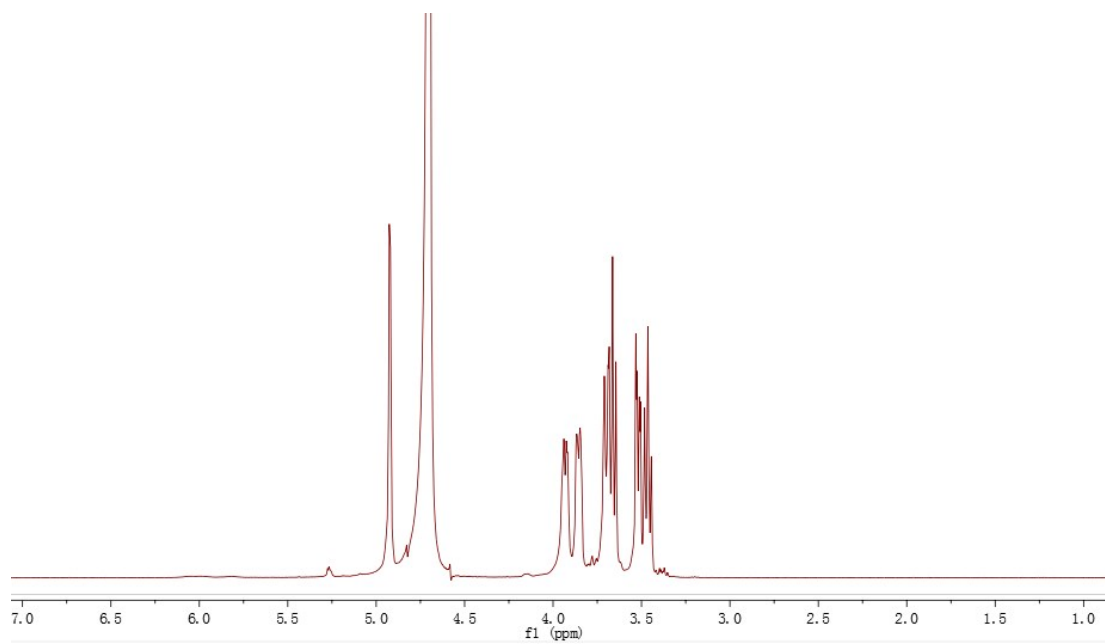

Figure S3.  $^1\text{H}$ -NMR of Oxidized Dextran

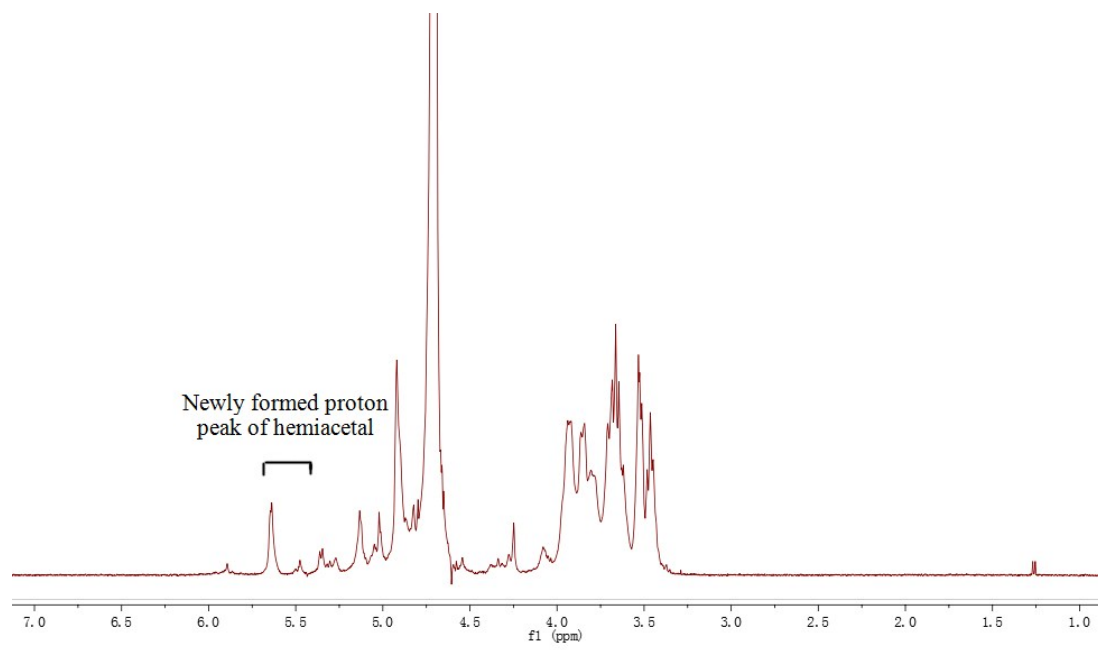

Figure S4. FT-IR of Dextran

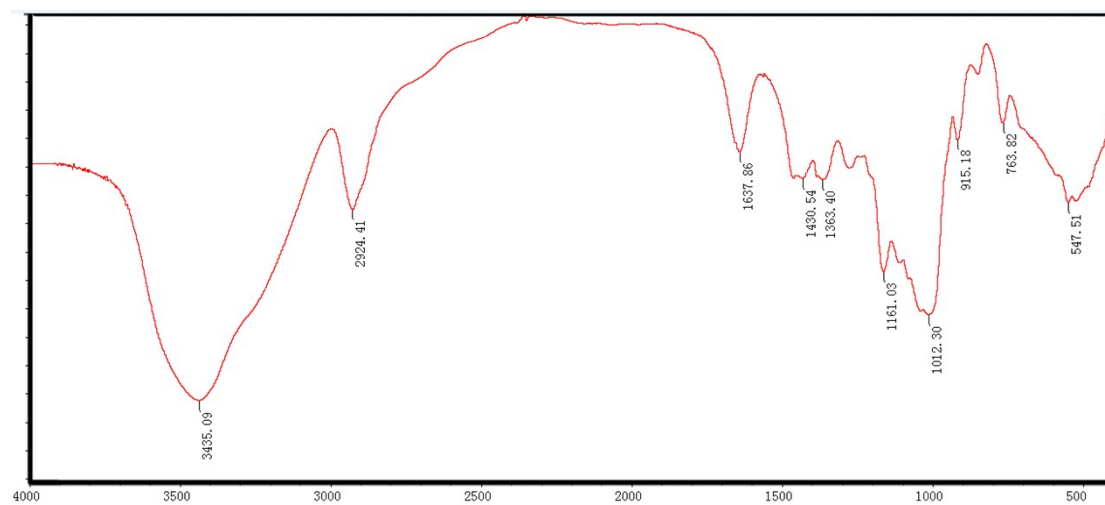

Figure S5. FT-IR of Oxidized Dextran

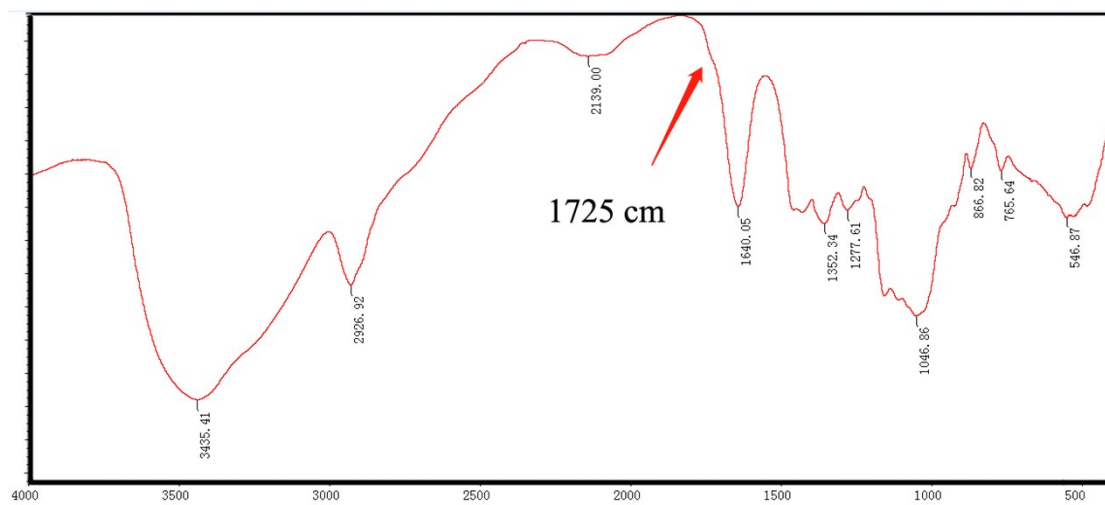

Supplement: d0ra02218g1.pdf [file d0ra02218g1.pdf]
